# Supplementary material
Source: publisher figshare collection journal article supplement (https://tandf.figshare.com/ndownloader/files/35117837)
Supplement: Supplementary file 1 [file 35117837]

**Studies on diesel engine exhaust gas for retrieving the waste heat through Triple Tube Heat Exchanger (TTHE) through different tubes**

**AUTHORS BIOGRAPHY**

**Mohan Raman**

**Mohan** **Raman** received the B.E. degree in mechanical engineering from the Madras University, Chennai, in 2001 and M.E degree in Thermal engineering from Anna University, Chennai, in 2005 and a Ph.D. degree in Heat transfer and CPU cooling from Anna University Chennai in 2012. He currently works as professor in Mechanical engineering department in Sona college of Technology, Salem. His current research interests include the Heat transfer, Thermal engineering and CPU Cooling. He has published over 50 papers in peer reviewed journals and international conferences.

**ORCID:**

<https://orcid.org/0000-0002-7230-5001>

**Perumal Saravanan**

**Perumal Saravanan** received the B.E. degree in mechanical engineering from the Anna University, Thiruchirapalli, in 2012 and M.E degree in CAD from Anna University, Chennai in 2014 and currently doing a Ph.D. degree in Heat transfer in Anna University Chennai. He currently works as Assistant professor in Mechanical engineering department in Muthayammal engineering college, Namakkal. His current research interests include the Heat transfer, Thermal engineering and Nanofluids. He has published over 25 papers in peer reviewed journals and international conferences.

**ORCID:**

[NOT](https://orcid.org/0000-0002-7230-5001) APPLICABLE

**Suresh Muthusamy**

**Suresh Muthusamy** received the bachelor’s degree in Electrical and Electronics Engineering and the master’s degree in Power Electronics and Drives during the year 2009 and 2011 from Anna University, Chennai and Anna University, Coimbatore respectively. Currently, he is working towards the Ph.D. degree in Electrical Engineering at Anna University, Chennai in the area of Hybrid Renewable Energy Systems. Since 2011, he has been working as Assistant Professor Senior Grade in the Department of Electronics and Communication Engineering at Kongu Engineering College (Autonomous), Perundurai, Erode. He published more than 75 research articles in the reputed international journal publications like Elsevier, Springer, Taylor & Francis, SAGE, ASME, etc & indexed in SCI, SCIE, Scopus and Web of Science with good impact factor and also presented many papers in national and international conferences. His areas of interests include hybrid renewable energy systems, power electronic converters, hybrid electric vehicles and battery management systems.

**ORCID:**

<https://orcid.org/0000-0002-9156-2054>

**Shankar Subramaniam**

**Shankar Subramaniam** received the bachelor’s degree in Mechanical Engineering, master’s degree in Engineering Design from Bharathiyar University, Coimbatore and the Ph.D degree in the area of Machine Design/Contact Mechanics from Indian Institute of Technology, Madras during the year 2001, 2002 and 2008 respectively. He is currently working as Professor in the Department of Mechatronics Engineering at Kongu Engineering College (Autonomous), Perundurai, Erode. He published more than 120 research articles in reputed journals. His research interest includes computational mechanics, tribology, biomechanics, ergonomics, finite element analysis, etc.

<https://orcid.org/0000-0002-7153-8217>
